# Supplementary material for: Consolidation alters motor sequence-specific distributed representations
Source: eLife journal article supplement (doi:10.7554/elife.39324), 2019-03-18
Supplement: supp [file elife-39324-supp-v1.zip]

Archive with 12 entries (12 files):
- elife_poa_e39324_Supplementary_File_4.docx
- elife_poa_e39324_Source_code_2.csv
- elife_poa_e39324_Figure_2_figure_supplement_2.pdf
- elife_poa_e39324_Supplementary_File_2.docx
- elife_poa_e39324_Source_code_1.csv
- elife_poa_e39324_Supplementary_File_3.docx
- elife_poa_e39324_Figure_2_figure_supplement_1.pdf
- elife_poa_e39324_Transparent_Reporting_File.pdf
- elife_poa_e39324_Supplementary_File_1.docx
- elife_poa_e39324_Figure_1_figure_supplement_1.pdf
- elife_poa_e39324_Figure_2_figure_supplement_3.pdf
- elife_poa_e39324_Figure_2_figure_supplement_4'.pdf
