# Supplementary material for: Consolidation alters motor sequence-specific distributed representations
Source: eLife journal article supplement (doi:10.7554/elife.39324), 2019-03-18

**Whole-brain cross-validated Mahalanobis distance map (each subject)**

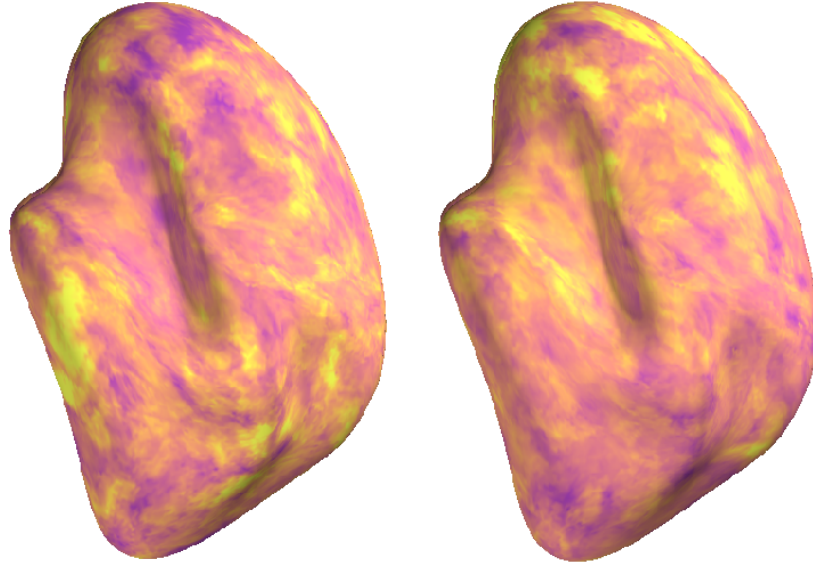

**Cross-validated Mahalanobis distance matrix (each voxel)**

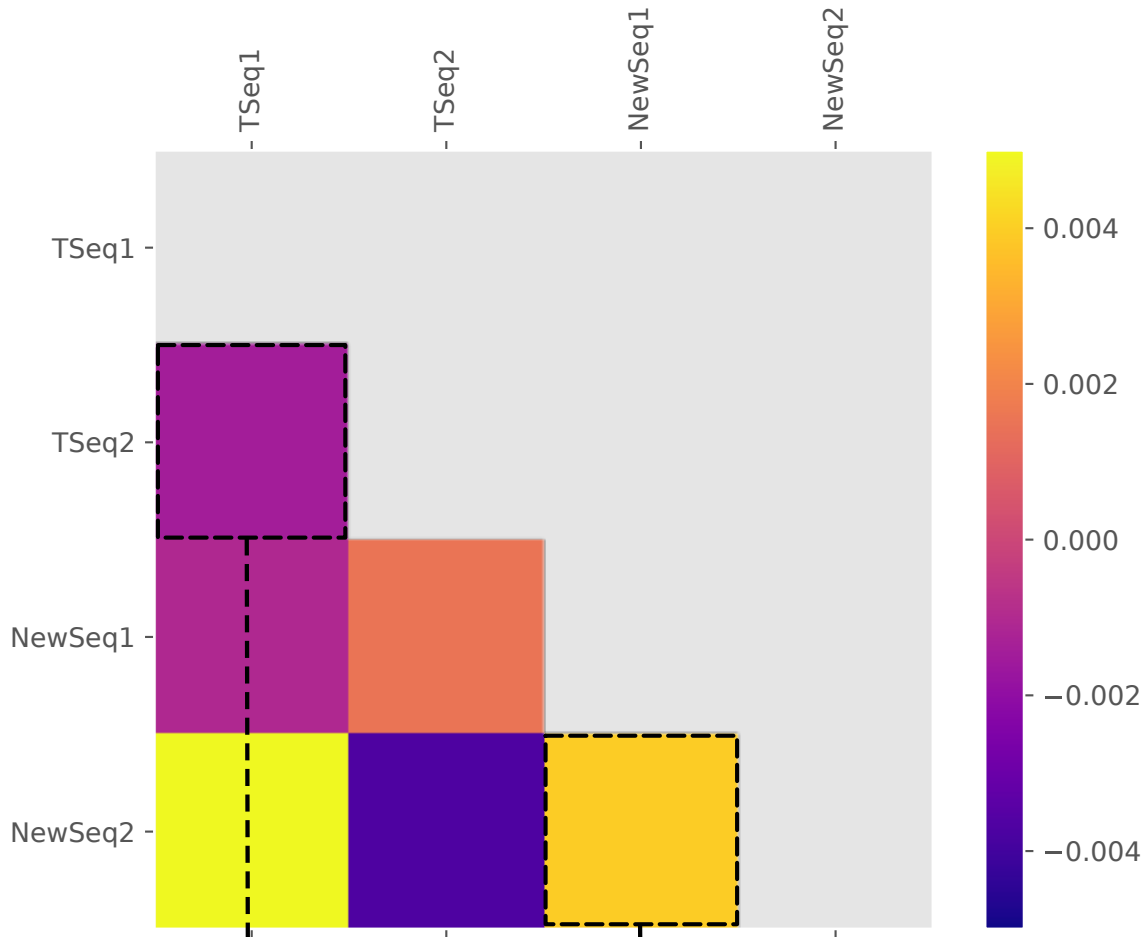

Supplement: supp [file elife-39324-supp-v1.zip › elife_poa_e39324_Figure_2_figure_supplement_4'.pdf]
