# Supplementary material for: Consolidation alters motor sequence-specific distributed representations
Source: eLife journal article supplement (doi:10.7554/elife.39324), 2019-03-18
Supplement: supp [file elife-39324-supp-v1.zip › elife_poa_e39324_Source_code_1.csv]

	center-of-mass MNI coordinates
Nvoxels	x	y	z
136	-23.84371	-89.844856	16.72504
13	-16.12863	-50.04557	3.397013
926	-23.363178	-56.314053	51.922989
30	-8.408931	-35.869358	67.612617
12	-3.623247	-33.362164	60.484661
21	-6.661858	-26.185081	58.088249
235	-37.296146	-4.668319	52.383289
87	-52.444904	-36.138439	40.675312
12	-37.221058	-37.169781	50.661961
148	-52.332123	-40.107697	28.48675
46	-41.333115	-37.277527	20.293686
23	-61.765705	-44.380924	17.805477
12	-33.744366	-32.840725	17.840309
52	-10.957157	-91.122749	28.744446
14	-8.518139	-59.845131	40.724731
35	-10.068754	-55.540585	34.698303
117	-52.668976	-50.428535	-10.648604
13	-34.586342	-85.750404	31.460787
19	-56.592426	-15.45382	34.453014
239	-38.16655	10.918655	31.250193
100	-32.621979	-21.38707	-23.415571
19	-42.626144	-50.676163	-11.803124
12	-40.640392	6.700186	-38.585102
49	-12.252837	-100.778038	-7.408085
149	-10.483567	-92.129021	-11.247499
11	-28.225658	-98.00193	-0.268181
22	-64.56916	-31.056261	-10.032089
355	25.411421	-77.908623	29.73802
131	12.674767	-16.036415	43.335987
1863	24.393913	-35.665066	56.866711
15	30.875633	-23.900921	50.59454
27	28.880922	1.367043	51.710232
122	23.775173	-1.555012	54.146816
11	22.195246	-29.694517	62.330013
22	48.571804	18.641047	3.921401
35	35.269882	9.087346	12.08933
19	9.773443	-62.229191	47.391407
16	14.18604	-48.452667	31.433725
179	36.858383	-81.537598	7.262738
48	45.725773	-58.012753	34.504719
156	55.550419	3.354484	12.735389
25	64.690399	-11.375331	22.088856
112	50.068226	2.981966	38.286541
165	43.331024	24.13085	26.664759
12	50.165955	4.350915	20.030134
55	17.600128	-97.836037	-2.068337
19	-49.157895	-68	-33.052632
10	-10.4	-5	-12.8
1	6	-78	-28
