# Supplementary material for: Consolidation alters motor sequence-specific distributed representations
Source: eLife journal article supplement (doi:10.7554/elife.39324), 2019-03-18
Supplement: supp [file elife-39324-supp-v1.zip › elife_poa_e39324_Source_code_2.csv]

		center-of-mass MNI coordinates
	Nvoxels	x	y	z
consolidated>new
	10	-9	-59.4	-44.2
	16	-17.25	-29.625	6.875
	58	-29.137931	-4.310345	1.137931
	19	-14.105263	-15.789474	-8.736842
	152	16	-80.763158	-33.710526
	421	10.940618	-15.957245	8.812352
	46	27.173913	-3.652174	9.826087
	74	-4.840905	-26.196671	28.394781
	10	-6.062666	-52.944206	20.773594
	21	-10.806525	1.291964	43.773643
	13	-4.034913	-6.048241	37.587212
	136	-10.089617	-39.423328	44.252964
	93	-15.710166	-47.199444	66.958878
	17	-12.055939	-33.337997	69.799866
	16	-38.440491	-29.314949	56.590279
	29	-44.691093	25.846077	3.056808
	45	-21.139608	-75.775436	44.88797
	21	-5.527525	-56.192158	49.223602
	11	-6.513222	-53.477818	42.399887
	17	-38.698257	14.668359	33.018742
	13	-41.24374	18.814745	-30.928593
	56	-32.332375	-8.424625	-30.099331
	263	21.640978	21.08592	50.997658
	429	22.270538	53.964481	-3.983507
	84	5.888274	-35.046623	27.725412
	151	16.047159	-59.650761	-2.824844
	11	5.355057	-42.145733	19.588036
	61	9.034444	0.11727	51.103741
	93	13.643236	-41.270084	61.513119
	64	57.968197	-41.168358	39.943565
	12	41.58736	-28.954458	20.135294
	26	41.04752	30.732159	-14.004183
	11	45.878628	30.743372	-6.929072
	42	46.446835	-64.735664	37.516792
	43	44.134674	-54.741096	47.963741
	30	52.026321	-48.386288	42.238762
	85	58.269768	-14.555677	17.945169
	23	37.668705	2.938533	35.878197
	14	55.126076	6.365266	17.066628
	14	14.926537	28.67695	-21.926895
	16	14.193501	21.783346	-15.813894
	43	24.782528	-65.435196	4.47993
	11	16.619644	-61.897373	11.816824
	109	10.488252	-57.18895	20.106026
	16	32.171856	37.554939	23.724434
	12	38.03138	0.607621	51.726437
new>consolidated
	11	-42.363636	-50	-48.363636
	28	-7.285714	4.285714	5
	12	-29.333333	-35	-7.333333
	28	-19.214286	-27.928571	-4.857143
	19	22.736842	-8.105263	-24.842105
