# Supplementary figures and images for: Consolidation alters motor sequence-specific distributed representations
Source: eLife journal article supplement (doi:10.7554/elife.39324), 2019-03-18

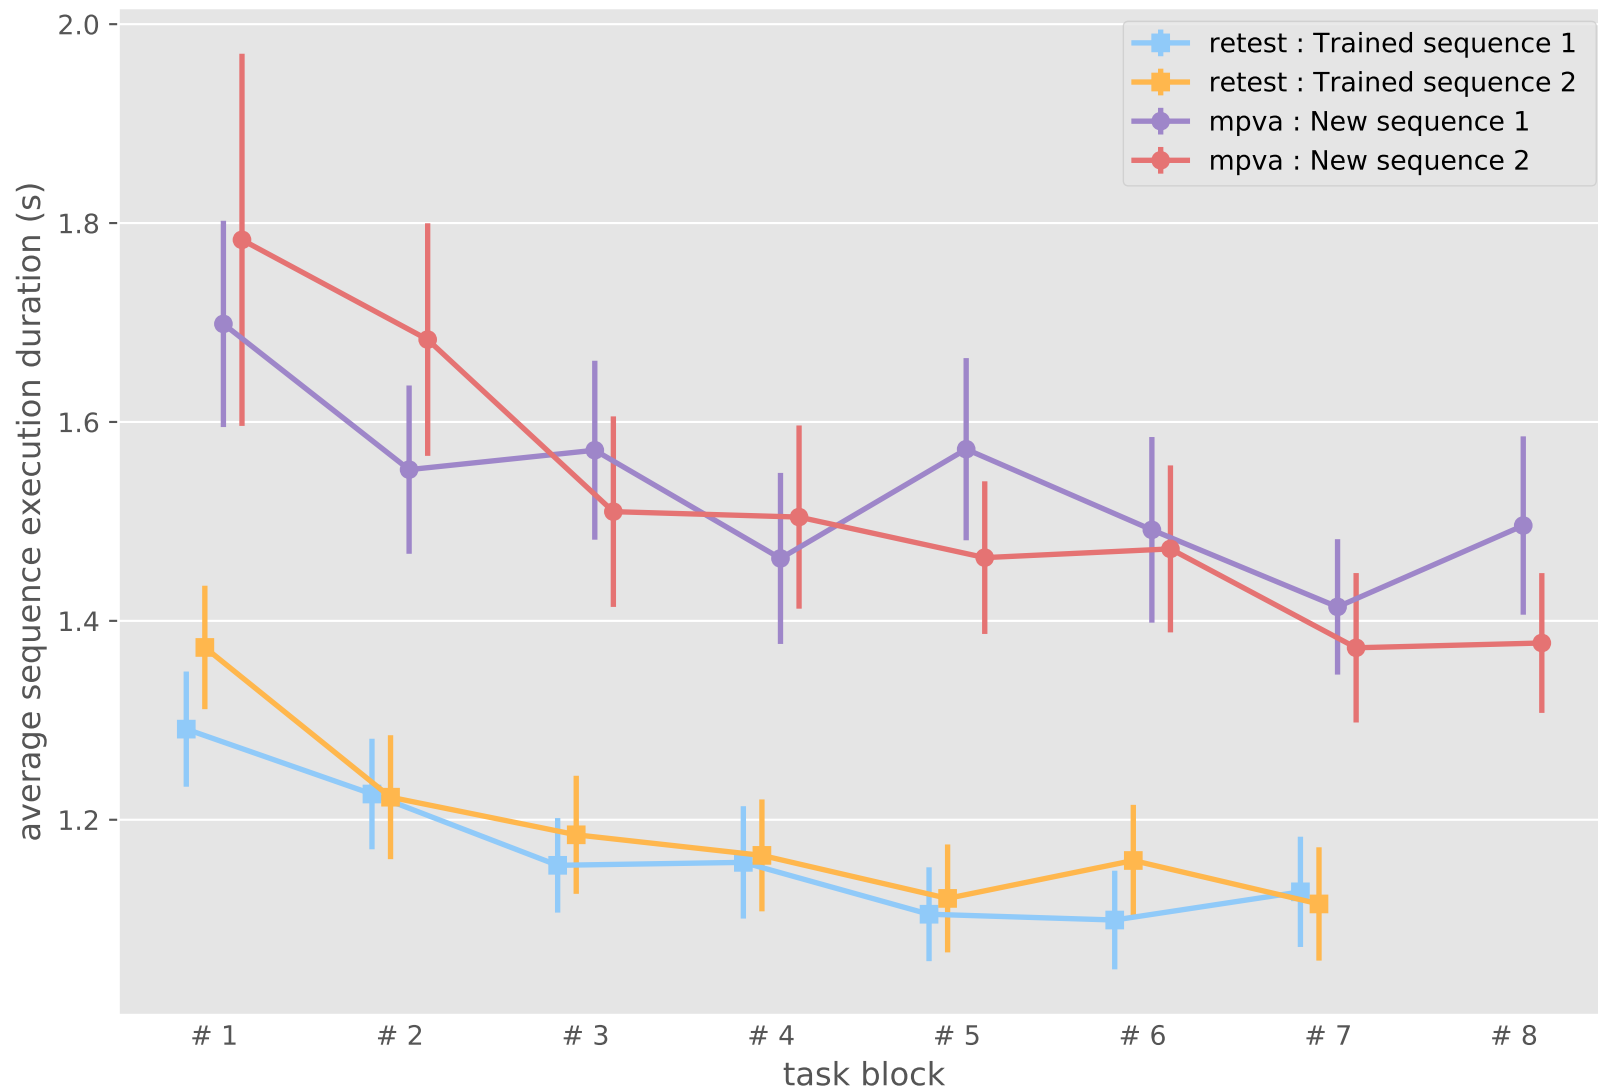

Supplement: supp [file elife-39324-supp-v1.zip]

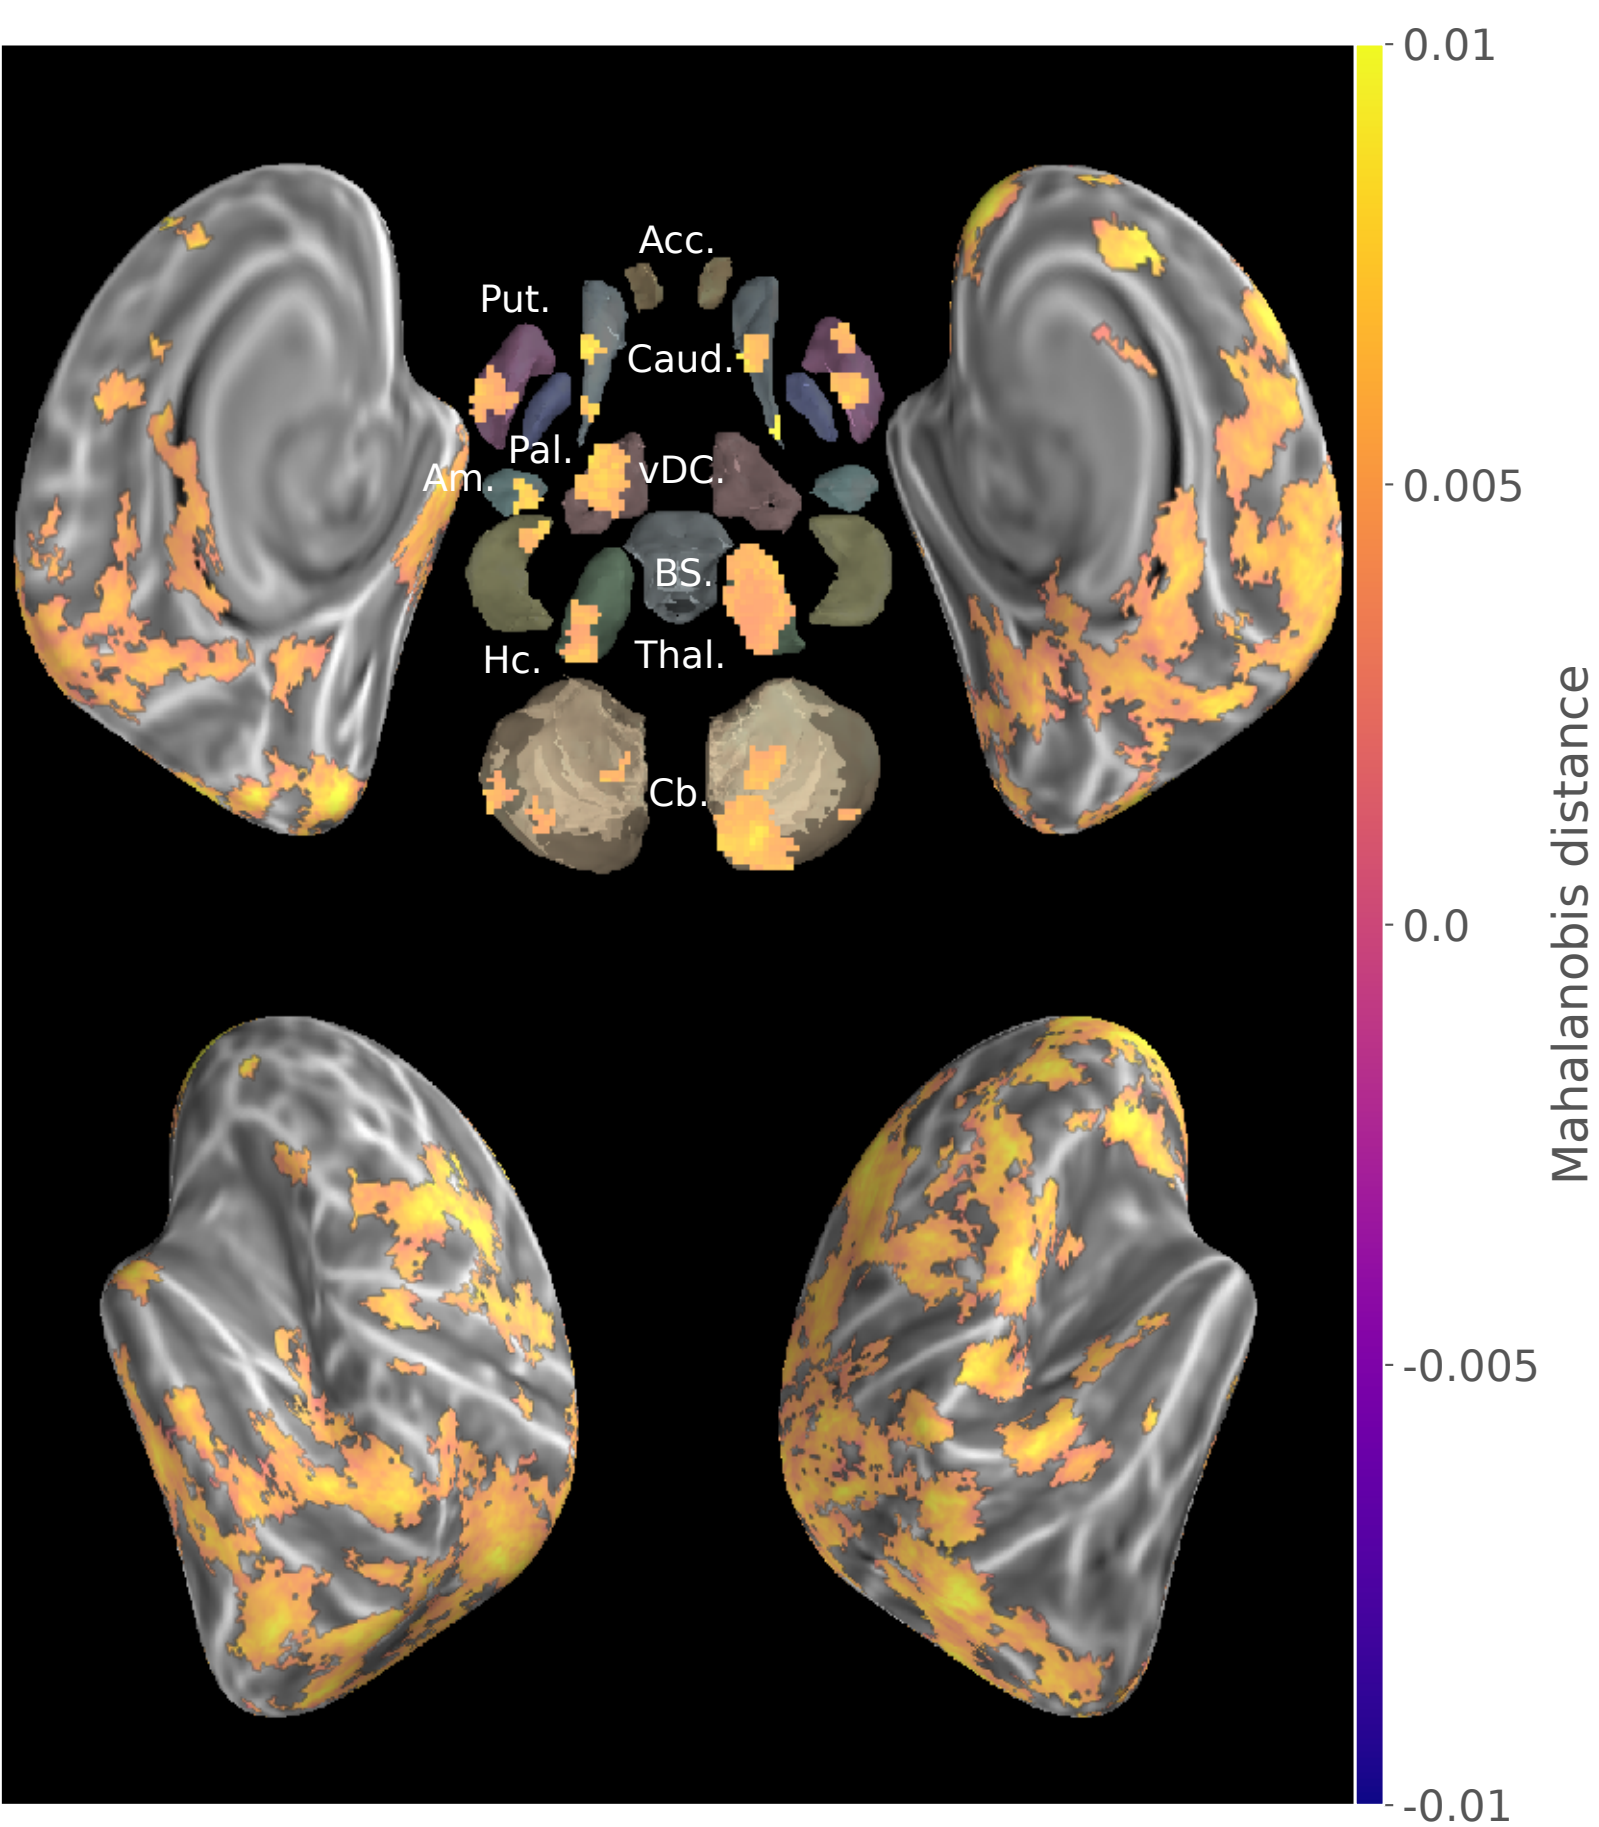

Supplement: supp [file elife-39324-supp-v1.zip › elife_poa_e39324_Figure_2_figure_supplement_2.pdf]

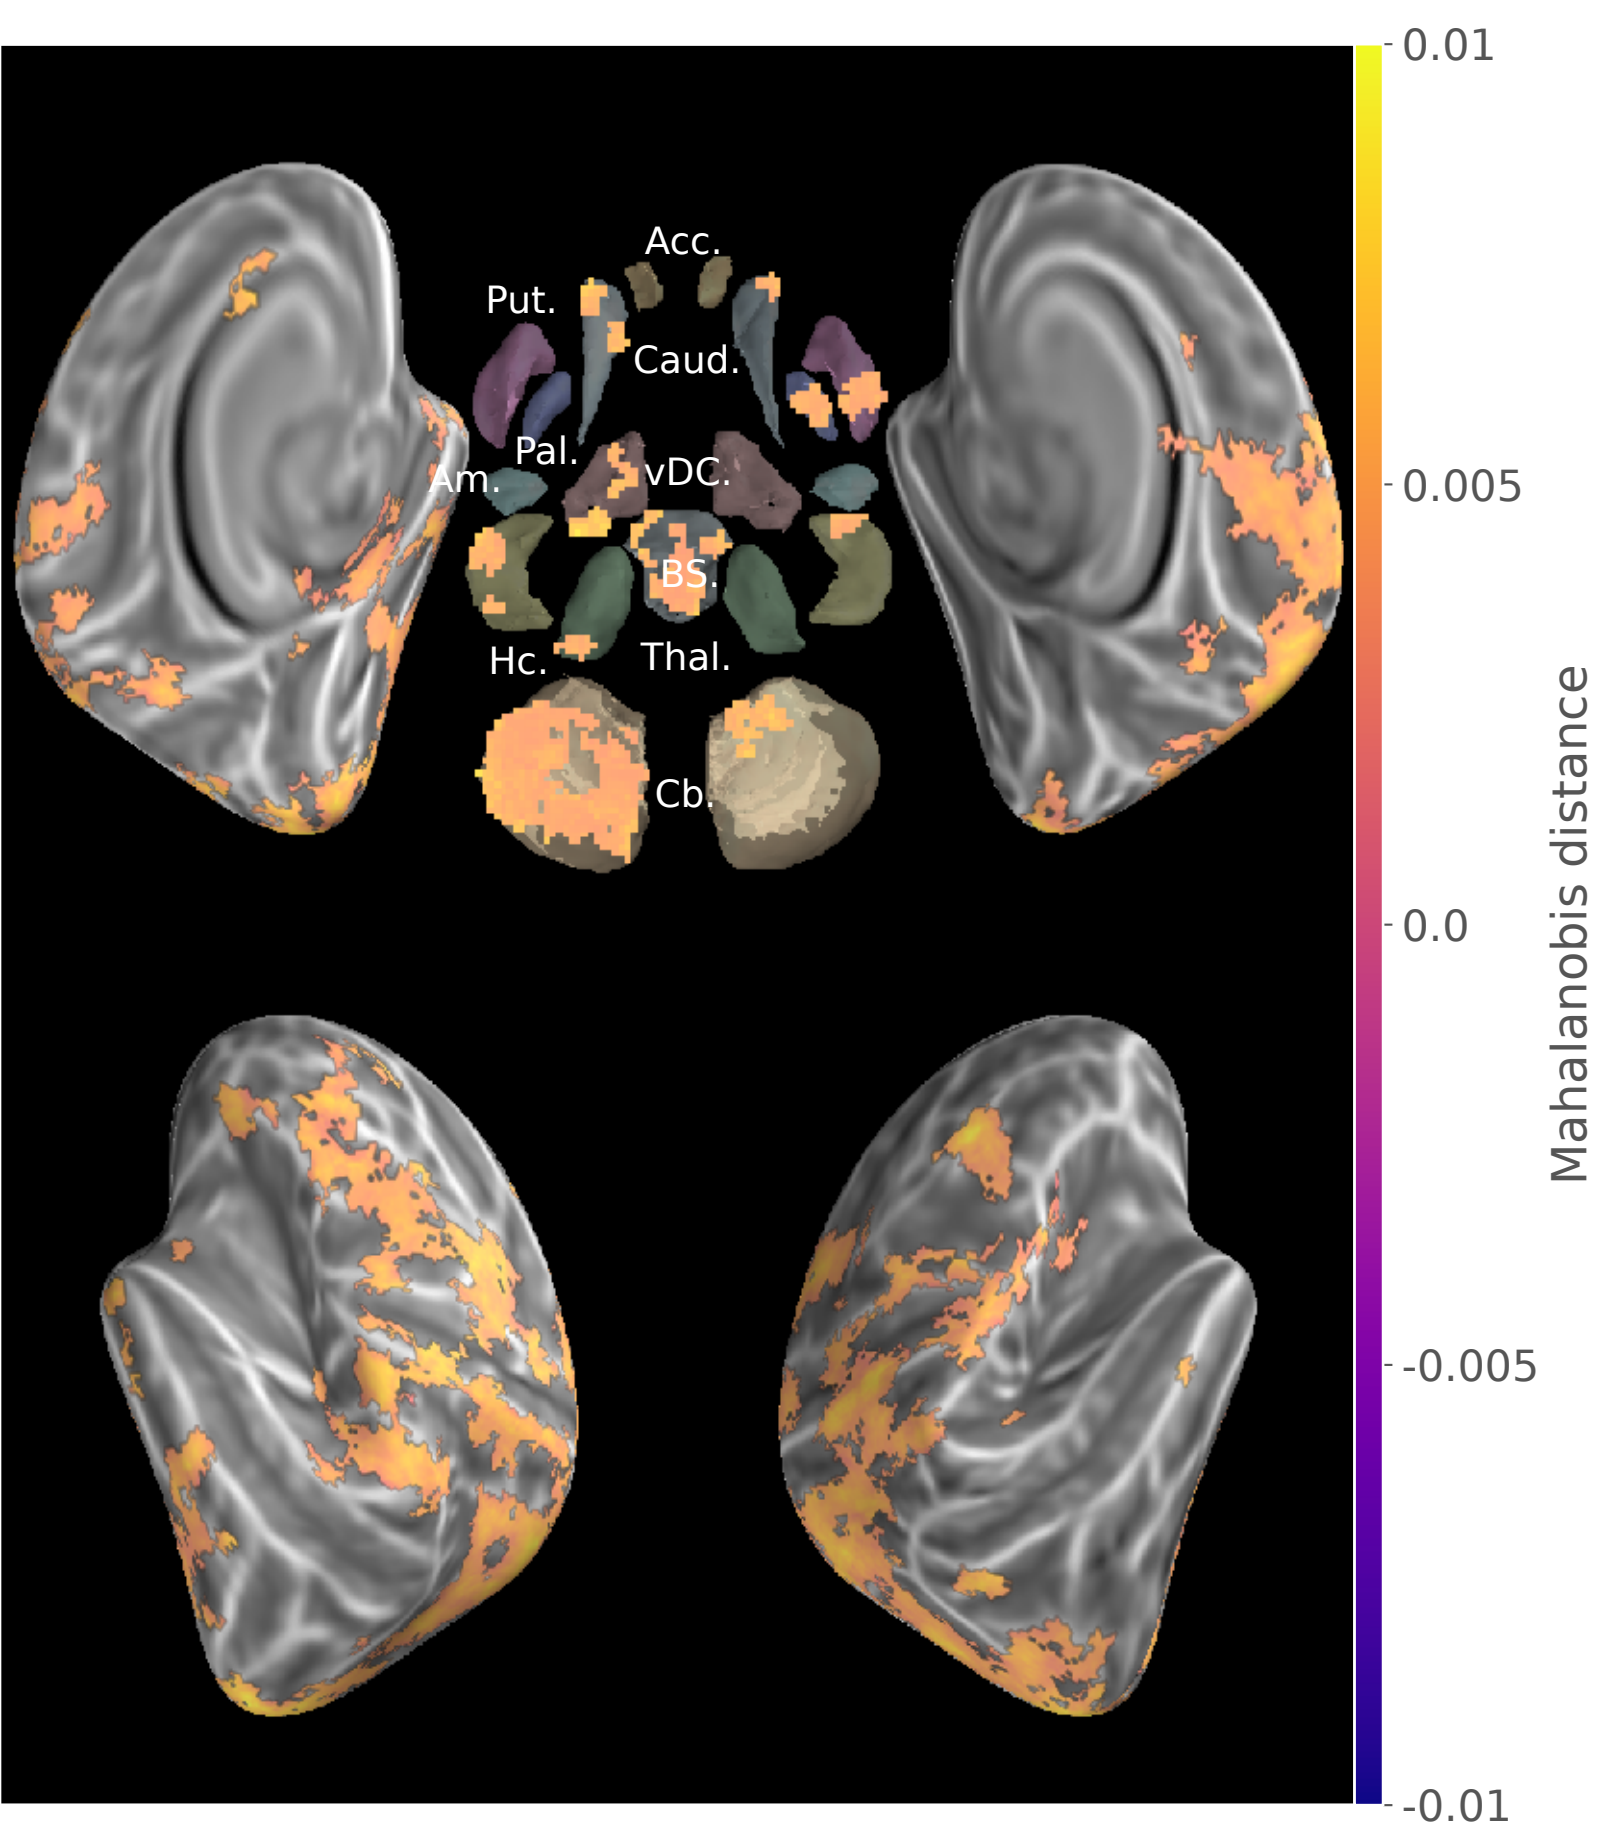

Supplement: supp [file elife-39324-supp-v1.zip › elife_poa_e39324_Figure_2_figure_supplement_1.pdf]

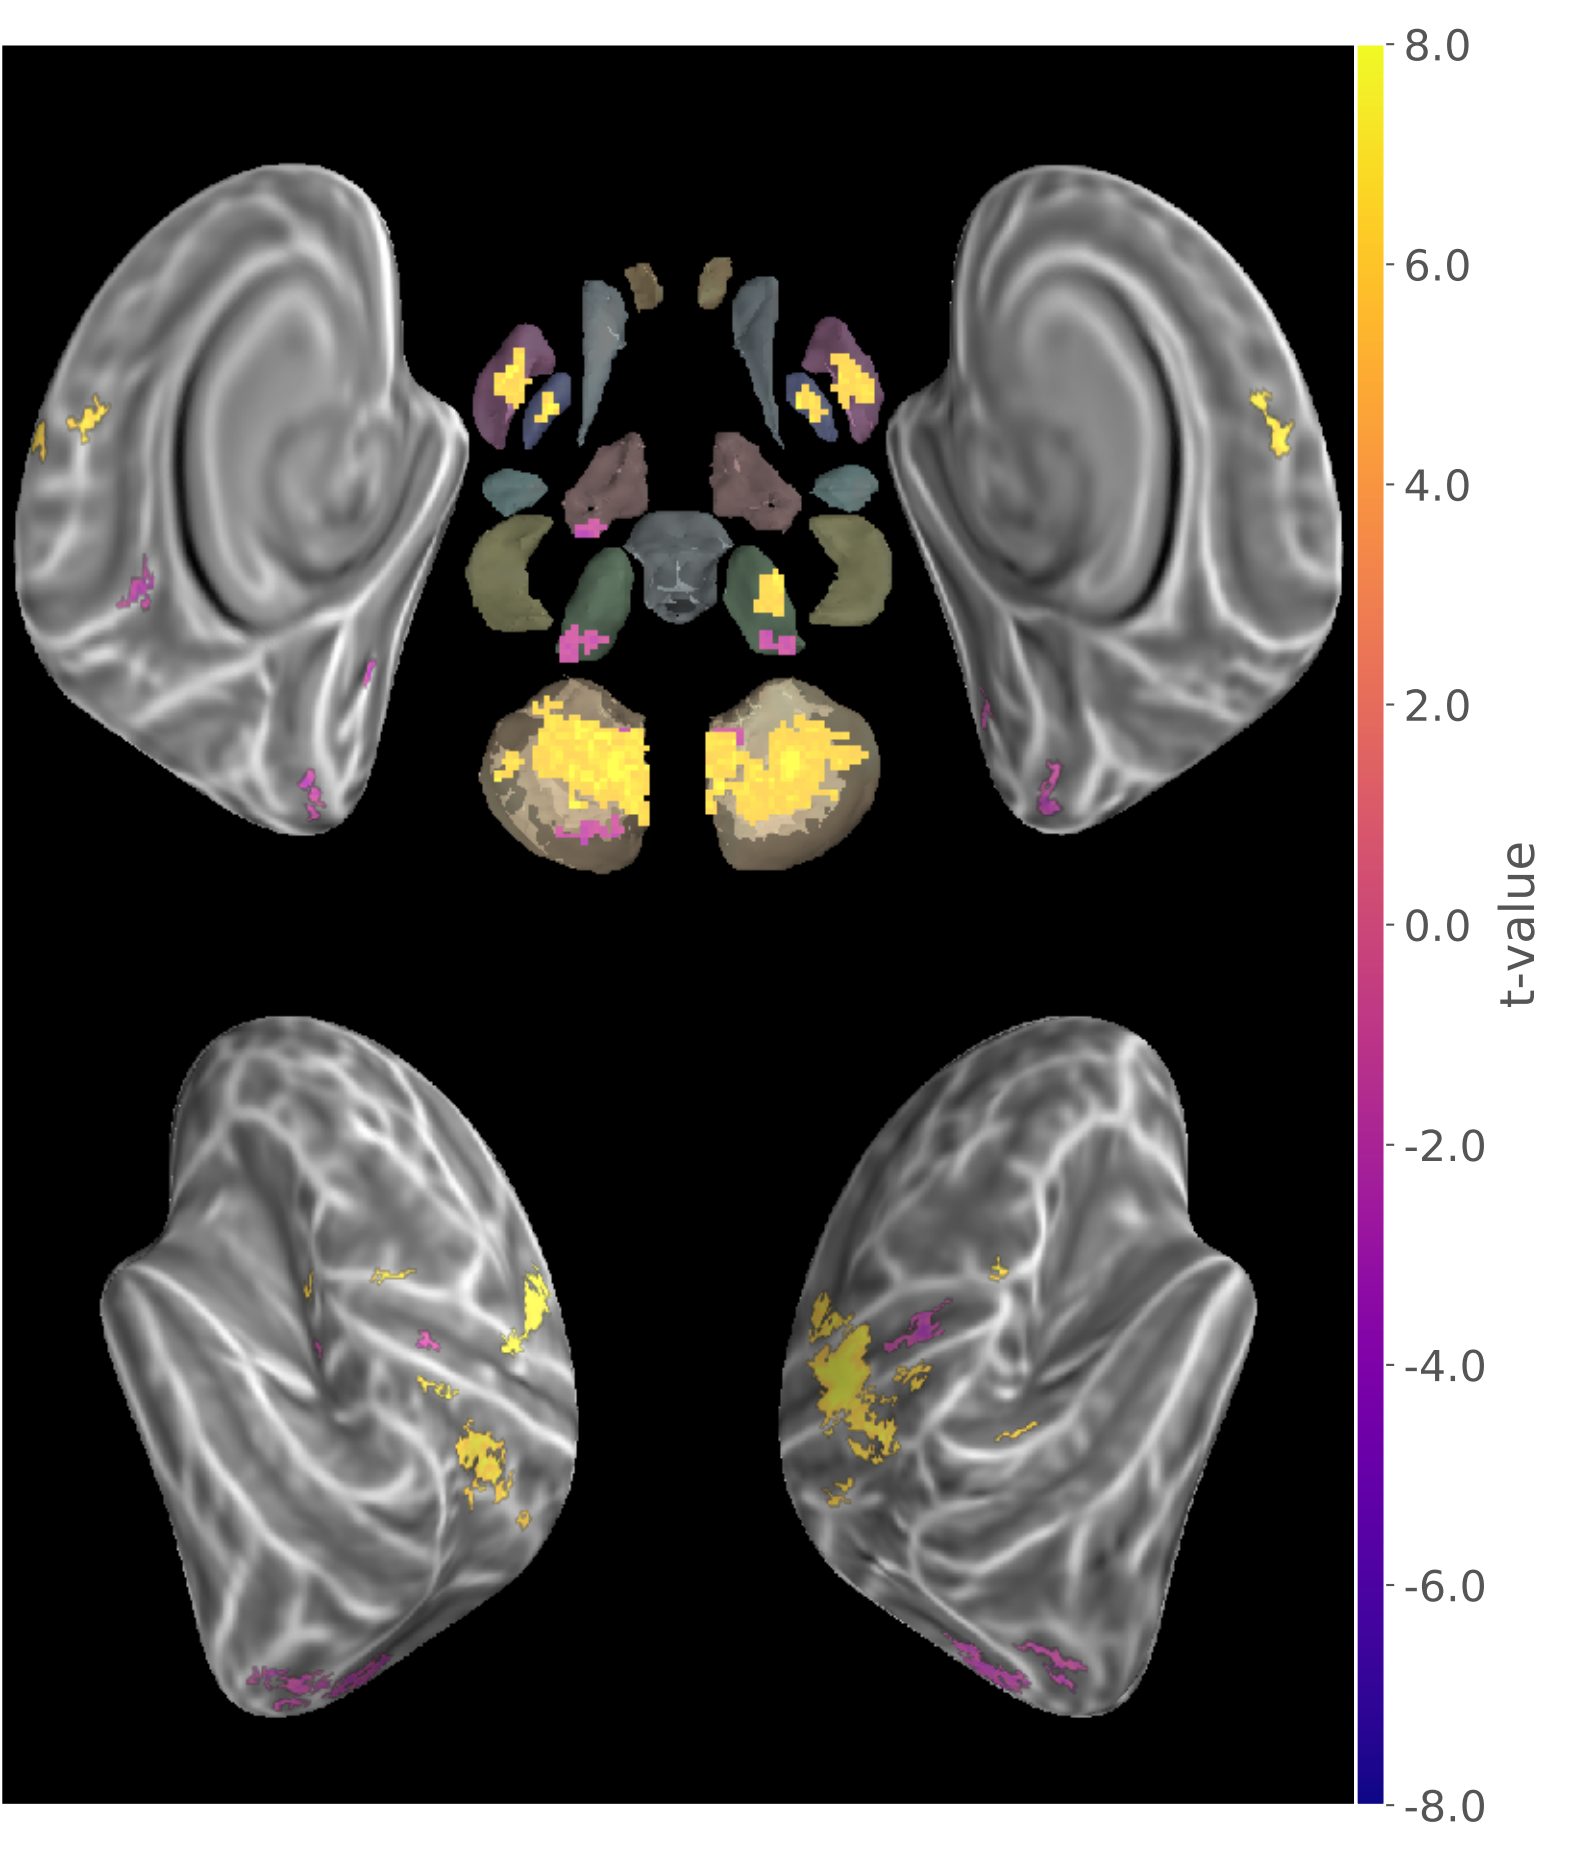

Supplement: supp [file elife-39324-supp-v1.zip › elife_poa_e39324_Figure_2_figure_supplement_3.pdf]
